# Supplementary material for: Designing AI-powered translation education tools: a framework for parallel sentence generation using SauLTC and LLMs
Source: PeerJ Comput Sci. 2025 Mar 31;11:e2788. doi: 10.7717/peerj-cs.2788 (PMC12190550; doi:10.7717/peerj-cs.2788)
Supplement: Supplemental Information 3 — English text and corresponding Arabic translation. [file peerj-cs-11-2788-s003.xlsx]

## Sheet: Sheet1
	English	Arabic
0	step 1 inform yourself If you or a loved one has been diagnosed with cancer, or even if you simply want to do all you can to avoid it, your first step is to understand what cancer is and how you can help your body fight it. The knowledge you gain here will help you to take action to reduce your risk. If you already have a diagnosis, you will be better able to understand what your doctors tell you…	الخطوة الأولى ثقف نفسك اذا تم تشخيصك أو تشخيص من تحب بالسرطان ,أو في حال كنت ترغب ببساطة أن تفعل كل ما بمقدورك لتجنب الإصابة به , فإن خطوتك الأولى هي أن تفهم ما هو السرطان وكيف يمكنك أن تساعد جسمك على مكافحته. وستساعدك هذه المعارف التي ستكتسبها هنا على اتخاذ الإجراءات اللازمة للتقليل من خطر الإصابة به. أما في حال تم تشخيصك بالمرض فسوف تكون أقدر على أن تفهم ما يخبرك به أطباؤك وتعرف ماهي الأسئلة ال…
1	Try yoga or Pilates. Both these disciplines are hugely beneficial to body and mind. once youve decided what you want to try , adapt your activity dialy and plan in some form of exercise at least three times a week for a 30-minute slot. Be specific, decide on a day and a time so youre more likely to do it and consider involving a friend so youre less liky pull out at the last minute. Like you did …	حاول ممارسة اليوغا أو بيلاتيس . فأن جميعها مفيدة بشكل كبير للجسم والعقل. ذات مرة قررت ما تريد تجربته ؟ التكيف مع الخطط و النشاطات اليومية هي شكل من أشكال ممارسة التمارين في البداية على الأقل ثلاث مرات في الأسبوع لمدة 30 دقيقة. احذر من الانسحاب في اللحظة الأخيرة اتخذ قرارك في يوم ووقت محدد و قم باشراك صديقك معك .كما فعلت سابقا عند جدولة الأنشطة الإيجابية، يمكن أن تكون مفيدة لترتيب ممارسة التمارين …
2	Introduction: Metabolism is a word frequently used and seldom understood by dieters. And its no wonder. The information available - online, in magazines and books, from your doctor, and from well-meaning friends - is not only conflicting, its often incorrect. Food manufacturers add to the confusion, because they want consumers to believe that their products are the answer to speeding up your meta…	المقدمة: الأيض هي كلمة كثيرًا ما تستخدم , ونادرًا ما يفهمها الأشخاص الذين يتبعون النظام الغذائي , ولا عجب في ذلك فهناك تناقض وعدم صحة في المعلومات المتاحة على الإنترنت وفي المجلات والكتب ومن طبيبك وأصدقائك الذين يقدمون النصح بحسن النية. كما أن منتجو المواد الغذائية يزيدون الموضوع إبهاماً وذلك لأنهم يرغبون أن يصدق المستهلك بأن منتجاتهم هي كل ما يحتاجونه لزيادة سرعة عملية الأيض لديهم و بأنها تسمح ل…
3	A GOLDEN AGE FOR THE BRAIN What do we really know about the human brain? In the 1970s and 1980s, when the authors gained their training, the honest answer was “very little.” There was a saying circulating back then: Studying the brain was like putting a stethoscope on the outside of the Astrodome to learn the rules of football. Your brain contains roughly 100 billion nerve cells forming anywhere …	العصر الذهبي للدماغ ما الذي نعرفه حقا عن الدماغ البشري؟ في عقد السبعينات والثمانينات، عندما انهى المؤلفون تدريبهم، أصدق إجابة كانت `القليل جدا`، كان هناك مقولة متداولة في ذلك الوقت، وهي: كانت دراسة الدماغ البشري مثل وضع سماعة الطبيب على السطح الخارجي لقبة الملعب من أجل تعلم قواعد كرة القدم. يحتوي دماغك على ما يقرب من 100 مليار خلية عصبية، تقوم بتشكيل روابط يتراوح عددها من تريليون حتى كوادريليون، …
4	YOUR BRAIN, YOUR WORLD as you move through this book, you will see that mind, brain, and body work seamlessly together. Life is a continuous process. The deeper you master this process, the closer you are to arriving at the goal of super brain. A researcher like Rudy, looking at data about neuroplasticity, can marvel at how the brain creates new pathways. But the greater wonder is that mind can c…	عقلك هو عالمك خلال تصفحك لهذا الكتاب، سترى أن العقل والدماغ والجسد يعملان معا بسلاسة. الحياة عملية مستمرة، فكلما اتقنت هذه العملية، كلما اقتربت من الوصول إلى الهدف من العقل الخارق. قد يتعجب باحث مثل رودي، وهو يبحث في البيانات المتعلقة بالمرونة العصبية، من مقدرة العقل على خلق مسارات جديدة، ولكن الأعجب من ذلك هو أن العقل يستطيع انتاج مادة، وهذا يحدث فعلا في الدماغ، كما أنه يحدث آلاف المرات في الثان…
5	4 How the Program Works Now that you know the science of why you’re doing this program, let’s jump in and get to the what, when, who, and how of the Blood Sugar Solution 10-Day Detox Diet. WHAT YOU’LL DO I have had such a hard time over the years gaining any control over my weight, no matter what I have tried. Low-fat, no-fat, low-carb, and on and on and on to no avail. I am so appreciative of th…	4 كيفية عمل البرنامج الآن وقد أدركتم سبب اتباعكم هذا البرنامج، دعونا ننتقل إلى ماهية وكيفية حمية الديتوكس لمدة 10 أيام فيما يخص حل مشكلة السكر في الدم ومن يستخدمها ومتى؟ ماذا ستفعل لقد مررت بوقتٍ عصيب طوال سنوات للسيطرة على وزني، ولكن دون فائدة. وقمت بتجربة أطعمة قليلة الدسم وخالية الدسم ومنخفضة الكربوهيدرات مرارًا وتكرارًا لكن دون جدوى. أنا ممتن جدًا لهذا البرنامج وأشكر الدكتور هيمان على اهتمامه…
6	Introduction Are you ready for a total body revolution? Welcome to the Blood Sugar Solution 10-Day Detox Diet! In my book The Blood Sugar Solution, I shared my proven six-week plan for preventing, treating, and even reversing diabetes and pre-diabetes. Millions of people were amazed as they fixed their life-threatening blood sugar problems. At the same time, the program kicked their metabolism in…	المقدمة هل انت مستعد لتغيير جسمك بشكل جذري؟ مرحبًا بك في حمية الديتوكس ذات العشر ايام لحل مشكلة السكر في الدم. قد استعرضت خطة الست أسابيع في كتابي حل مشكلة السكر في الدم للوقاية ومنع الإصابة بالسكري او الاعراض التي تسبق داء السكري. فقد ذُهل الملايين ممن حسنوا نظام حياتهم الذي كان مهدد للخطر بسبب مشاكل داء السكري وفي الوقت ذاته هذا النظام قد حسّن عملية الهضم لديهم وساعدهم على التخلص من الدهون الصع…
7	Next she described a second tier of people she called It-like. These individuals may lack the natural, intuitive ability to connect with people with autism; they may even be nervous, hesitant, or uncomfortable. But they are eager to learn, and they seek support and advice from a parent or someone else who knows the child well. Jill explained that this included many professionals she met and that …	ومن ثم قامت بوصف المجموعة الثاني من االناس بـ المجموعة التقليدية. وهم الذين لديهم نقص في قدراتهم وحدسهم الطبيعي للتواصل مع الأشخاص الذين يعانون من التوحد. و قد يكونوا اكثر توترا وتردداوقلقين ولكنهم متحمسين للتعلم وييطلبون المساعدة والنصح من الوالد اومن شخص اخر يعرف الطفل جيدا بالطفل. وقد وضحت (جيل) هذا للعديد ومنهم الخبراء التي التقت بهم بأنها تشعر بالسعادة دوما عندما تلتقي بمثل هؤلاء الأشخاص – أ…
8	CHAPTER ONE Arthritis: An Introduction Perhaps you shrugged it off the first few times you experienced it: an uncomfortable feeling in your knee, the lingering pain in your lower back when you got up in the morning, the slight change in flexibility in your hands. Maybe you have begun needing help opening jars. The stairs may be a bit more painful to climb. You hear a grating or popping sound in y…	الفصل الأول التهاب المفاصل: مقدمة ربما تجاهلت الأحساس به في المرات القليلة التي شعرت فيه, أحساس غير مريح في ركبتك و آلآم دائمة أسفل الظهر عندما تستيقظ في الصباح. والتغير الطفيف في مرونة يديك. ربما بدأت بالحاجة الى المساعدة عند فتح العلب. وقد يكون صعود الدرج مؤلما قليلاً , وقد تسمع أصوات مثل الفرقعه من أسفل ظهرك عندما تتحرك بطرق معينه. والمقلق في الأمر بأن هذه الأعراض لن تختفي, وهذا عندما قد يحدث …
9	To begin examining how type 2 diabetes can be healed, we need to look at how it developed in the first place. As mentioned, the heavier you are, the greater your risk of developing type 2 diabetes. For some people even a small amount of excess fat on the body can trigger diabetes. Your body’s cells are fueled primarily by glucose. Insulin is the hormonal messenger produced by the beta cells in th…	للبدء في اختبار كيف أن النوع الثاني من السكري يمكن شفائه ؛ نحن بحاجة للنظر لكيفية تطوره في المقام الأول وكما ُذُكر سابقًا كلما كان الوزن ثقيلا زاد احتمال إصابة الشخص بالسكري ولبعض الأشخاص يمكن أن تنسب كمية صغيرة زائدة من الدهون بمرض السكري يغذي الجلوكوز خلايا الجسم . والأنسولين هو مرسال هرموني لإنتاج خلايا بيتا في البنكرياس . والذي يساعد في تزويد الجلوكوز لخلايا الجسم ,ولا يمكن للجلوكوز العبور إل…
10	Working Keep Work From Killing You In 1951, a team of researchers embarked on an 18-year study of San Francisco dock workers to examine the factors that predisposed these men to fatal coronary heart disease. When they published their findings nearly two decades later, many of the usual suspects emerged as contributors to heart disease: elevated blood pressure, cigarette smoking, and obesity. Yet …	العمل أستمرار العمل قد يسبب لك أضرار في المستقبل شرع فريق من الباحثين في عام 1951 بدراسة الحالة الصحية لعمال الشحن والتفريغ في سان فرانسيسكو لمدة 18 عام وذلك للكشف عن العوامل التي تؤدي إلى إصابة هؤلاء الرجال بمرض الشريان التاجي المميت . فعندما نشروا نتائج بحثهم بعد مرور عقدين من الزمن ظهرت العديد من العوامل التي اشتبه في مساهمتها بمرض القلب وضغط الدم المرتفع وتدخين السجائر والسمنة. أحد النتائج ال…
11	Bananas: PEEL A BANANA AND TAKE A BITE or slice or mash it into your diet. Why? Because there are so many fabulous nutrients in bananas, plus they’re easy on your stomach. One large banana contains 4 g of fiber and about 20 percent of your daily vitamin C and vitamin B6 needs. BANANAS AT A GLANCE: Serving Size: 1 large banana Calories: 121 Saturated Fat: 0 g Protein: 1 g Fiber: 4 g Calcium: 1% Vi…	الموز: قشر موزه وخذ قضمه أهرسها أو قطعها إلى شرائح وأضفها إلى حميتك الغذائية , لماذا ؟ لأن الموز يحتوي على الكثير من العناصر الغذائية الرائعة التي تكون خفيفة على المعدة , تحتوي موزه كبيرة الحجم على 4 جرامات من الألياف وحوالي 20% من حاجتك اليومية لفيتامين C و B6 . نبذة بسيطة عن الموز: مقدار الحصة: موزه واحدة كبيرة. كالسيوم: 1% السعرات الحرارية: 121 فيتامين A: 2% الدهون المشبعة: 5 جرامات فيتامين :C…
12	7 Your template for the ten days is simple. While the daily to-dos are the same, the recipes and daily theme are customized so you’ll know exactly what to cook, eat, and focus on each day. All you have to do is follow each step carefully and the results happen automatically. YOUR DAILY SCHEDULE Here is the plan you’re going to follow for each of the ten days. I encourage you to do each of these p…	(الفصل السابع ) ممارساتك اليومية : النموذج المقترح للنمط الغذائي ذو العشرة أيام بسيط إذ أنك سوف تتبع نفس طريقة إعداد الطعام وتنوع من الوصفات الغذائية لتناسب نمط الحمية الخاصة بك . لذا سوف تكون على علم تام بما تطهوه وتأكله في كل يوم. كل ما عليك فعله هو أن تتبع جميع الخطوات التالية بعناية وسوف ترى النتائج تلقائيًا. جدولك اليومي : هنا نستعرض الخطة التي سوف تتبعها طوال العشرة أيام , ويجب عليك القيام …
13	Building on Enthusiasms Still, some parents and professionals view these interests as yet another undesirable symptom of autism, one that makes it even more difficult for the child to fit in. Often their instinct is to discourage the child, to redirect his attention and suggest interests that are more socially acceptable and conventional. But discouraging an enthusiasm can be just another way of …	مبني على الحماس مازال يرى بعض الآباء والمهنيّون هذه الاهتمامات كعَرَض آخر غير مرغوب فيه لمرض لتوحد الذي يجعل الانسجام مع المجتمع بالنسبة لطفل التوحد أكثرَ صعوبة ، فغالبًا ما تكون دوافعهم صدّ الطفل وإعادة توجيه اهتماماته و اقتراح اهتمامات تكون مقبولة اجتماعيًا ومألوفة ، لكن قد يكون عدم تشجيع الطفل مجرد طريقة أخرى لإتلاف الاستراتيجية التي تعمل على مساعدة الطفل المتوحد ليشعر أفضل انضباطًا أو أسوأ من…
14	Introduction The American Cancer Society and the National Cancer Institute estimate that about 12,400 children in the United States under the age of 20 are diagnosed each year with cancer. This represents about 1% of all cancer cases diagnosed in the United States. However, childhood cancer is the second leading cause of death (after accidents) for children between the ages of 5 and 14, and the t…	الأطفال المصابون السرطان المقدمة: قدرّت كُلّا من الجمعية الأمريكية للسرطان والمؤوسسة الوطنية أن هناك حوالي 12400 طفلًا تحت سن ال 20 يتم تشخيصه بالسرطان كل سنه بالولايات المتحدة، وهذا يمثّل حوالي 1٪ من جميع حالات السرطان التي تم تشخيصها في الولايات المتحدة. ومع ذلك فأن سرطان الأطفال يعتبر السبب الثاني الذي يؤدي للوفاة (بعد الحوادث) للأطفال بين سن ال 5 الى 14 والثالث المؤدي للوفاة (بعد الحوادث والت…
15	CHAPTER 3 The complication of diabetes The term ‘complications of diabetes’ generally refers to the long-term effects that diabetes has on various parts of the body. At their worst these can lead to blindness, kidney failure and amputations. It is a sad fact that many people will have experience of relatives and friends with diabetes who have been affected in this way. Others will have heard (wel…	الفصل الثالث مضاعفات السكري يشير مصطلح مضاعفات السكري عادة إلى آثار داء السكري على أجزاء الجسم المختلفة على المدى الطويل. يمكن أن تؤدي المضاعفات في أسوأ حالاتها إلى العمى والفشل الكلوي وبتر الأطراف. الحقيقة المحزنة أن العديد من الناس سيخوضون تجارب بأقارب وأصدقاء مصابين بالسكري الذين تأثروا بهذه الطريقة. أما البقية سيسمعون من أصدقائهم (بحسن نية) وهم يتحدثون عن الشخص الذي يعرفونه الذى أصيب بالعمى و…
16	Chapter 7 The Importance of Losing Weight In the first part of this book we have learned that in most cases of type 2 diabetes weight gain is predominant cause and that losing weight can lead to reversal of diabetes. I believe this has profound implications for how type 2 diabetes should be managed. The emphasis should be on lifestyle changes with the aim of losing weight while keeping blood gluc…	الفصل السابع أهمية فقدان الوزن لقد تعلمنا في الجزء الأول من هذا الكتاب أن في معظم حالات النوع الثاني من داء السكري تعد زيادة الوزن سبب شائع للإصابة به وفي حين ان فقدان الوزن قد يؤدي الى عكس مسار داء السكري وأعتقد بأن لهذا آثار عميقة فيما يتعلق بكيفية التعامل مع النوع الثاني من داء السكري. ويجب ان يكون التركيزعلى تغيير نمط الحياة بهدف فقدان الوزن مع الحفاظ على مستويات السكر في الدم تحت السيطرة. وه…
17	INTRODUCTION Our greatest battles are that with our own minds. —Jameson Frank Jameson Frank was right—your battle to be thin starts with your mind. If you’re someone who has spent years struggling to manage your weight, yo-yo dieting and never the getting long-term results you desire, Train Your Brain to Get Thin is just the book you need to give you the knowledge and confidence to get started do…	مقدمة أعظم معاركنا هي تلك التي مع عقولنا - جيمسن فرانك كان جيمسن فرانك صائباً- تحديك بأن تصبح نحيلاً يبدأ مع عقلك، فإذا كنت شخصاً قد امضى سنواتً يكافح من اجل ان يراقب وزنه أو يتبع حمية اليويو ولم يحصل ابداً على نتائج طويلة المدى التي يرغب بها، مرّن عقلك لتصبح نحيلاً هو الكتاب الذي سوف يمنحك المعرفة والثقة في ان تبدأ في الطريق الصحيح لشكلٍ جديد ورشيق وصحي. ظل الدماغ لغزاً لعدة سنوات, ولكن التطورات…
18	Chapter -9 The Real Experts IN 1986 Temple Grandin forever altered public perceptions about autism when she published her fir st book, Emergence: Labeled Autistic. Here, for the first time, was an articulate, intelligent adult who could describe with insight and clarity the experience of living with autism. She detailed her thinking processes, explained her sensory sensitivities, spoke of the dif…	(الفصل التاسع ) الخبراء الحقيقيون في عام 1986 قامت تمبل قراندين بتغيير بعض المفاهيم حول مرض التوحد من خلال اصدارها كتابها الاول. عندها ظهر مفهوم التوحد وتكلمت بوضوح عن الكبار البالغين الذين يمتلكون البصيرة والقدرة على وصف تجربتهم بوضوح حول مرض التوحد. شرحت تمبل في كتابها عمليات التفكير وحساسية الشعور وتكلمت عن انواع اساليب التعلم عند مرض التوحد, وسردت العديد من التحديات المختلفة التي واجهتها كلما…
19	The immune system produces them in response to foreign substances that may be a threat to the body, for example, chemicals, virus particles, bacterial toxins, or cancer. These foreign substances are called antigens. Each type of antibody is unique and defends the body against one specific type of antigen. Because an antibody binds only to a specific antigen, it can act as a homing device to a tum…	ينتج الجهاز المناعي الأجسام المضادة كاستجابة للمواد الدخيلة التي قد تشكل تهديداً للجسم، كالمواد الكيماوية أو الجسيمات الفيروسية أو البكتيريا الجرثومية أو السرطان، وتسمى هذه المواد الدخيلة بالمستضدات. كل نوع من الأجسام المضادة نادر ويدافع عن الجسم ضد نوع معين من المستضدات لأن الجسم المضاد يرتبط فقط بمستضد معين، ويمكن أن يعمل كجهاز إرشاد لخلية الورم. ويعنى مصطلح الاجسام المضادة وحيده النسيلة انها م…
20	Step 5: Eat Yogurt Eat 1, 200 mg of Calcium Every Day Yogurt has a long and colorful history. Until the early 1900s, it was a staple food in the Russian empire. At the time, scientists attributed the unusually long life span of Bulgarian peasants—many of whom lived well past the century mark—to the regular consumption of yogurt. Whether or not you believe the longevity lore surrounding yogurt, th…	الخطوة الخامسة: تناول الزبادي تناول مقدار ١٢٠٠مل جرام من الكالسيوم يوميا يعتبرالزبادي من الأطعمة التي لها تاريخ طويل فقد كان الزبادي هو الغذاء الأساسي في الإمبراطورية الروسية حتى بداية العقد الأول من القرن العشرين. وأرجع العلماء في هذا الوقت المدى العمري الطويل و غير الاعتيادي للفلاحين البلغاريين؛ حيث عاش العديد منهم بصحة جيدة وتخطى عمرهم القرن؛ إلى تناولهم المنتظم للزبادي.وسواءا كنت تعتقد أم لاب…
21	Step 1: Lose Five Pounds Eat Fewer Calories and Burn More SMALL WEIGHT LOSS, BIG BLOOD PRESSURE REWARD You can do this! Aim for losing just five pounds this next month (thats just a touch over one pound a week) and you will be taking the most powerful lifestyle step toward getting your blood pressure down. According to the World Health Organization, high blood pressure is often caused by being ov…	الخطوة الأولى: افقد خمس باوندات. تناول كميات أقل من السعرات الحرارية واحرق الكثير. افقد القليل من وزنك ,واكسب انخفاض ضغط دمك. يمكنك ذلك! اجعل هدفك في الشهر القادم بأن تفقد خمس باوندات فقط ( أي ما يعادل تقريباً باوند واحداً أسبوعياً). وبذلك ستتخذ خطوة متقدمة في نمط حياك لخفض ضغط دمك. ووفقاً لما قالته منظمة الصحة العالمية فإن زيادة الوزن وقلة النشاط البدني هما غالباً الأسباب وراء الإصابة بارتفاع ضغ…
22	WHAT YOU THINK IS GOOD FOR YOU MIGHT BE MAKING YOU FAT, SICK, AND STUPID After hacking the Bulletproof Diet and discovering how little energy it actually took to lose weight, keep it off, and feel great, I got angry. When I lost my first 50 pounds of fat in 3 months, the number on the scale elated me, but at a deeper level I felt betrayed. Id struggled for so long to exercise and stick to a low-f…	من الممكن أن يجعلك ماتعتقده جيدا بالنسبة لك سمينًا ومريضًا وغبيًا. بعد إختراق نظام الحمية الخالية من الثغرات واكتشاف ان قليل من الطاقة تُستهلك لإنقاص الوزن لذا حافظ على وزنك و كن سعيدا. انا اصبحت غاضبًا عندما خسرت أول ٢٥ كيلو من الدهون في ٣ أشهر فالعدد بالميزان قد اعجبني ولكن على مستوى أعمق شعرت بخيانة. لقد كافحت فترة طويلة لممارسة الرياضة والالتزام بنظام غذائي منخفض الدهون ومنخفض السعرات الحراري…
23	A different view was offered on rice pudding by the delegates who had come to the conference from Bradford, an industrial center in the north of England. At this time, under the guidance of a visionary medical officer named Ralph Crowley, Bradford was the greatest pioneer of good school food in the country. Before school meals were brought in, the city had suffered some of the worst child malnutr…	كانت وجهة نظرالمندوبين الذين أتوا إلى المؤتمر من براد فورد (مدينة صناعية في شمال انجلترا) على بودنج الأرز مختلفة. وفي ذلك الوقت, احتلت براد فورد الريادة وذلك لكونها مدرسة الطعام الجيدة في البلاد بقيادة الطبيب الضابط الحالم رالف كراولي. وقد شهدت المدينة سوء تغذية أطفالها قبل مجئ الوجبات المدرسية على مستوى انجلترا كاملةً. وقام الدكتور كراولي بالإشراف على فريق من الأطباء الذين فحصوا جميع أطفال المدا…
24	IF YOU COULD ASK YOUR GRANDPARENTS or great-grandparents what people died from when they were growing up, you’d likely hear the words old age. Or you might learn the story of someone who got a nasty germ and passed away prematurely from tuberculosis, cholera, or dysentery. What you won’t hear are things like diabetes, cancer, heart disease, and dementia. Since the mid-twentieth century, we’ve had…	لو كان بإمكانك سؤال أجدادك أو أجداد أجدادك مما يموت البشر عندما يكبرون , أغلب الظن ستسمع تلك الكلمة الشيخوخة , أو ربما ستسمع قصة لأحدهم توفي بسبب إصابته بجرثومة السل أو الكوليرا أو الزُحار, ولكنك لن تسمع عن السكري والسرطان و أمراض القلب و الخرف. وننسب الوفاة منذ منتصف القرن العشرين إلى أمراض مختلفة بدلاً من استخدام مصطلح الشيخوخة في شهادة الوفاة. وتميل هذه الأمراض بتطورها المستمر إلى أن تصبح بحال…
25	The importance of shared childhood food memories for bonding families together can be seen among expats who carry their homeland with them in the form of ingredients smuggled in suitcases. In Greece, they sometimes refer to this desire for the food of home as a burning of the lips. When Greeks move abroad, their mothers will often send care packages of food containing such treats as oregano, thym…	تكمن أهمية مشاركة ذكريات طعام مرحلة الطفولة بأنها سبب لربط العوائل مع بعضها , و يمكن أن يُرى ذلك الآن بين الوافدين اللذين يهربون مكونات اطعمتهم في حقائبهم و كأنهم حاملين أوطانهم معهم . ففي اليونان يعبرون عن رغبتهم في تناول أطعمة بلدانهم بـ احتراق الشفاه كنايةً عن اللهفة لتناول تلك الأطعمة . وعندما ينتقل أحدهم إلى الخارج ترسل لهم امهاتهم تعبيراً عن اهتمامهن طرود المحبة التي تحتوي على الأطعمة كـ ال…
26	This approach to creating new, better likes sounds almost too good—too simple—to be true. For one thing, it only addresses vegetables, which is a good place to start, but there’s a lot more to a healthy diet than just greens. For many children, it is the protein foods—eggs, meat, fish—that are the hardest to love. Tiny Tastes also presumes that a child will willingly cooperate, once stickers are …	ساعد هذا المنهج على حب المأكولات الجديدة و الصحية جداً , فوصف الخضروات التي بدورها تعتبر بداية جيدة ولكن ليست الوحيدة , فهناك الكثير من المأكولات الصحية والمفيدة غير الخضروات . يصعب على كثير من الأطفال حب المأكولات الغنية بالبروتين كالبيض واللحم والسمك ايضاً , فنُظم نظام التيني تيست ليساعد الأطفال على حب هذه المأكولات عن طريق الملصقات , ولكن كان من الصعب إقناع الأطفال شديدي الكرة وذو الحالات المع…
27	In fact, studies dating back as far as the 1990s show that people who have taken nonsteroidal anti-inflammatory medications such as Advil (ibuprofen) and Aleve (naproxen) for two or more years may have more than a 40 percent reduced risk for Alzheimer’s and Parkinson’s disease.14, 15 At the same time, other studies have clearly shown dramatic elevation of cytokines, the cellular mediators of infl…	وفي الحقيقة، تشير الدراسات التي تعود إلى التسعينات، أن الأشخاص الذين تناولوا الأدوية اللاستيرودية المضادة للالتهاب مثل أدفل (ايبوبروفين) و أليف (نابروكسين) لمدة سنتين أو أكثر قد تقل خطورة إصابتهم بالزهايمر وداء باركنسون بنسبة ٤٠٪. وفي نفس الوقت أظهرت دراسات أخرى ارتفاعاً دراماتيكياً للسيتوكينات ووسائط الالتهاب الخلوية في أدمغة الأفراد الذين يعانون منها، وغيرها من اضطرابات الدماغ التنكسية. واليوم …
28	Tobacco It seems safe to say that most women in the West drink alcohol and consume caffeine when not pregnant and that both substances are generally accepted to be safe outside of pregnancy (in some moderation; not while driving; etc.). In contrast, tobacco is not recommended to anyone at any time. If you smoke, your doctor has presumably encouraged you to quit. But quitting is hard and most smok…	التبغ الجدير بالذكر أن معظم النساء في الغرب يشربن الكحول و يستهلكن الكافيين عندما لا يكن حوامل وأن كلاهما وأن كلاهما مقبول عامة خارج نطاق الحمل (مع بعض الاعتدال، و ليس أثناء القيادة، الخ). و في المقابل لا ينصح بالتدخين في أي ظرف و لأي كأن. وإذا كنت تدخنين، فغالبا أن طبيبك قد شجعك على الاقلاع عن التدخين . ولكن الإقلاع عن التدخين صعب و معظم المدخنين قد حاولوا ذلك من وقت الى اخر. الأسئلة في حالة الح…
29	. . . . . . Lunar Month one First Trimester HOW MUCH WEIGHT TO GAIN If you are of average weight for your age and height, you should gain anywhere from 25 to 35 pounds over the course of your pregnancy. While you should plan on gaining some weight during your first trimester, it should happen gradually. You probably won’t gain very much weight this first month. At most, expect to see a gain of on…	. . . . . . الشهر القمري الأول الأشهر الثلاثة الأولى مقدار الوزن المكتسب إذا كان وزنكِ مناسباً لعمركِ وطولكِ، ينبغي أن تكتسبي ما بين ٢٥ إلى ٣٥ رطلاً خلال فترة الحمل. وقد تخططين لاكتساب بعض الوزن ومع ذلك تذكري أن زيادة الوزن ستحدث تدريجياً في الأشهر الثلاثة الأولى، وعلى الأرجح لن تكتسبي الكثير من الوزن في الشهر الأول من الحمل، فقد تكتسبين رطلاً أو رطلين على الأكثر. وفي الحقيقة، تفقد الكثير من النس…
30	Alcohol and tobacco Doctors almost all agree that you should not smoke or consume alcohol during your pregnancy. Alcohol consumption—especially in large amounts—can seriously damage your baby’s brain. Pregnant women who drink alcohol risk giving birth to babies with what is known as fetal alcohol syndrome (FAS). As babies with fetal alcohol syndrome grow up, they often have difficulty learning. C…	الكحول والتبغ يتفق تقريبا جميع الأطباء على أنه لاينبغي عليكِ التدخين أو شرب الكحول أثناء فترة الحمل. و قد يسبب شرب الكحول تحديدا بكميات كبيرة تلف خطير في دماغ طفلك، فالنساء الحوامل اللاتي يشربن الكحول معرضات لولادة أطفال مصابين بما يعرف بمتلازمة الكحول الجنينية (FAS). والأطفال الذين يعانون من متلازمة الكحول الجنينية غالبا مايكون لديهم صعوبة في التعلم خلال فترة نموهم. إضافة الى ذلك, قد يعانون من ص…
31	Bridget, 39 Tomorrow I will be thirty-eight weeks pregnant with a surprise baby boy that I publicly credit to Lyn-Genet’s Plan! I was your garden-variety unexplained infertile. On paper, I was completely healthy: blood work never showed anything that explained the infertility. I had headaches, sporadic malaise, joint pain, and recurring bouts of anxiety and depression. I’d tried everything: skin …	بريجيته، تسعة وثلاثون عامًا غدًا سوف أُتِم الأسبوع الثامن والثلاثون من حملي المفاجئ بصبي والذي يعود فضل حملي به لخطة لين جينيت! لقد كنت كغيري من النساء مصابة بعقمٍ مجهولةٌ أسبابه. إذ أنني كنت أتمتع بصحة جيدة بحسب التقارير الطبية، ولم تُظهر تحاليل الدم أيًا من الأمور التي بإمكانها تفسير هذا العقم. كما أنني عانيت من صداع وشعور بالضيق بشكلٍ متقطع وآلام المفاصل ونوبات متكررة من القلق والاكتئاب. قمت ب…
32	January January is a time of new beginnings and a chance to start the New Year off fresh with healthy habits and goals. This month we focus on tips that help you reset old behaviors, try new things, and set yourself up for a successful year of living well with diabetes. Ring In the New Year Right Too many New Years resolutions go off the rails by the end of January Why? Usually its because they a…	يناير يناير هو شهر البدايات الجديدة وهو فرصة لبدء السنة الجديدة بعادات وأهداف صحية. لذلك سنركز في هذا الشهر على نصائح تساعدك على إعادة ضبط السلوكيات القديمة، وتجربة اشياء جديدة، وتهيئة نفسك لسنة ناجحة بالتعايش الجيد مع داء السكري. احتفل بالسنة الجديدة بشكل صحيح تتلاشى الكثير من قرارات السنة الجديدة بحلول نهاية يناير. ولكن لم؟ لأنها غالباً ماتكون غامضة جداً، أو كبيرة للغاية، أو غير واقعية. اتخذ قر…
33	30/ Cool Tips for Insulin Try using a protective pouch with a small cold gel pack to protect your insulin from the hot temperatures. Cooling wallets can keep insulin, pens, and pumps at a safe temperature, without the need for refrigeration, for up to 48 hours. They are reusable too! 31 A Handful of Heart Health Did you know that 12 tart cherries have only 59 calories and 14 grams of carbohydrate…	30/ نصائح رائعة للإنسولين جرب استخدام كيس واقي مع كمادة جل باردة وصغيرة لتحمي الإنسولين من درجة الحرارة العالية، ومن الممكن أن تبقي المحافظ الباردة الإنسولين والأقلام والمضخات بدرجة حرارة معتدلة وبدون الحاجة للتبريد حتى ٤٨ ساعة. كما أنها ايضا قابلة لإعادة الإستخدام. 31/ حفنة من صحة القلب هل تعلم أن ١٢ كرزة تساوي ٥٩ سعرة حرارية و ١٤ غرام من الكربوهيدرات فقط ؟ تشير بعض البحوث أن المواد المضادة للإل…
34	Coping Strategies and Regulating Behaviors Here is the important irony: Most of the behaviors commonly labeled “autistic behaviors” aren’t actually deficits at all. They’re strategies the person uses to feel better regulated emotionally. In other words, in many cases they’re strengths. When a child with extreme sensory sensitivities enters a noisy room and cups his hands over his ears and rocks h…	استراتيجيات التعامل و سلوكيات التنظيم و هنا يمكن الاختلاف الكبير .معظم التصرفات المسماة عادة `بسلوكيات التوحد` لا تعتبر في الواقع عجزا أبدا لكنها تعتبر استراتيجيات يستخدمها الشخص للشعور بأنه متحكم بعاطفته على نحو أفضل. و بمعنى آخر فهي تعتبر نقاط قوة في كثير من الحالات. عندما يدخل طفل يعاني من مثيرات حسية حادة غرفة مليئة بالضوضاء و يضع يديه على أذنيه و يبدأ جسمه بالاهتزاز فهذا النمط من السلوك يعتب…
35	1 Why Are We Losing the Weight Loss Battle? We have a big fat problem. America is a fat nation, and we are failing to solve our big fat problem. Failing big-time. Almost 70 percent of Americans are overweight. In fact, one in two Americans has what I call diabesity—the spectrum of imbalance ranging from mild insulin resistance to pre-diabetes to full-blown type 2 diabetes. The scariest part is th…	لماذا نخسر معركة فقدان الوزن ؟ نعاني من مشكلة سمنة كبيرة . تعد أمريكا موطناً للسمنة ، ومازلنا نفشل فشلاً ذريعاً في حل مشكلة هذه السمنة الكبيرة . يعاني حوالي 70 بالمئة من الأمريكيين من زيادة الوزن ، وفي الواقع ، يعاني فرد بين كل أمريكيين من داء السكري المرتبط بالسمنة – وهو الخلل الذي يتراوح بين حدوث مقاومة الانسولين المتوسطة و حدوث مقدمات داء السكري ومن ثم ينتهي بحدوث النوع الثاني من داء السكري . …
36	Chapter 1 Mental/psychical disorders in adults Anxiety A patient suffering from anxiety has: – Psychical symptoms: pervasive worries, e.g. fear of having a serious illness, fear with no clearly-defined object or phobias; – Behavioural changes: nervousness, avoidance behaviour; – Physical symptoms: e.g., dry mouth, “lump in the throat,” nonspecific complaints (e.g. feeling of malaise, hot flashes …	الفصل الحادي عشر الاضطرابات العقلية و النفسية لدى البالغين القلق المرضى الذين يعانون من القلق لديهم: أعراض جسدية: مخاوف عديدة مثل الخوف من الإصابة بمرض خطير أو الخوف من شيء غير واضح أو الرهاب. تغيرات سلوكية: التوتر و سلوك التهرب. أعراض جسدية: مثل جفاف الفم ` غصة في الحلق ` و شكاوي غير محددة (على سبيل المثال الشعور بالتوعك و الشعور بهبة الحرارة أو البرودة و الشعور بألم منتشر) القلق سمة منتشرة لمن …
37	Reframing Echolalia Anyone who has spent time with a verbal person with autism is familiar with this tendency to repeat words, phrases, or whole sentences, often ad infinitum. Indeed echolalia is one of autism’s defining characteristics. In children who can speak it is often among the first indications to parents that something is amiss in a child, when, instead of responding or initiating with t…	اللفظ الصدوي أي شخص قضى وقت مع شخص مصاب بالتوحد يدرك ميلهم لترديد الكلمات أو العبارات أو الجمل بشكل كامل، عادة يكون ترديد الكلام بلا نهاية. بالإضافة إلى أن اللفظ الصدوي هو احد أعراض التوحد المعروفة. حيث يكون واحد من أول العلامات للآباء بأن هناك أمرا خاطئا في الطفل، عندما يردد الطفل الكلمات أو العبارات التي يسمعها من الآخرين بدلا من أن يبدأ بالاستجابة أو بدأ لغته الخاصة. الأم: عزيزتي، هل تريدين ال…
38	INTRODUCTION A Different Way of Seeing Autism NOT long ago I was meeting with a group of educators at an elementary school when things suddenly got personal. I was there in my role as a school district consultant for programs serving children with special needs, and as the meeting was breaking up, the principal asked to see me privately. I figured that he wanted to discuss a staff issue, but the …	المقدمة ________________________ مرض التوحد من منظور مختلفة منذو مدة ليست بالطويلة, عندما أصبحت الأمور فجأة تأخذ مساراً شخصياً, كنت في اجتماع مع مجموعة من المربين في مدرسة متوسطة, فقد كنت هناك بدوري مستشار مدرسة الحي للبرامج التي تخدم أطفال ذوي الإحتياجات الخاصة. عند إنتهاء الإجتماع, طلب المدير رؤيتي بشكل خاص حسبت عندها أنه يود مناقشة بعض أمور الموظفين. لكن المدير- رجل حاد و جاد - أغلق الباب, سحب…
39	Coping with Emotional Memories: How to Help The most important factor in helping a person with autism cope with negative emotional memories is to acknowledge and validate her experience and provide supports for emotional regulation. Often parents and teachers—with the best of intentions—have the opposite instinct. Some ignore the issue, hoping it will just go away. Others try to minimize the chil…	التغلب على الذكريات العاطفية: كيفية المساعدة اهم عامل لمساعدة الشخص المصاب بمرض التوحد للتغلب على الذكريات العاطفية السلبية هو الاعتراف والتحقق من صحة الحالة وتقديم الدعم لتنظيم العواطف. غالبا الوالدين والمعلمين ---بنوايا حسنة---لديهم حدس معاكس. بعضهم يتجاهلون القضية، آملين أنها ستختفي. والبعض الآخر يحاول ان يقلل من حالة الطفل بالتصريحات المطمئنة: أوه لا تقلق بشأن ذلك. على اية حال، هذه المنهجيات …
40	The Stress of Misunderstanding I have met countless people with autism who misread social situations and behavior, and even after someone tries explaining what they hadn’t grasped, they still don’t understand. Enduring that experience again and again takes its toll. Knowing I’m supposed to understand this, but no matter how hard I try, I can’t causes frustration, unhappiness, and anxiety. Many re…	الضغوط الناتجة من سوء الفهم لقد التقيت بالعديد من الناس المصابين بالتوحد والذين يفهمون الأوضاع والتصرفات الاجتماعية بشكل خاطئ ,والذين لن يفهموا مهما حاول الناس الشرح لهم مالم يستطيعوا إدراكه .ومرورهم بهذه التجربة مرارا وتكرارا يسبب لهم الحزن .ومعرفتي بأني مهما بذلت من جهد شديد لأفهم لن أستطيع يسبب لي التعاسة والحزن والقلق . ويتعامل العديد من المصابين بالتوحد مع المرض عن طريق الانغلاق عن اللقاءات …
41	The Complete Guide to Healing Arthritis DID YOU KNOW? Bone spurs, or osteophytes, are common in people who have arthritis. These bony projections form along joints and can greatly limit joint motion while also causing pain. Bone spurs form when the body makes an attempt to increase the surface area of the joint to better distribute weight across a joint, especially a knee or hip, that has been da…	هل تعلم؟ ان النتوءات العظمية تكثر لدى الاشخاص الذين يعانون من التهاب المفاصل, فهي تنمو عند المفاصل وتحد من حركة المفصل الى حد كبير مسببًة الألم. وتظهر تلك النتوءات عند محاولة الجسم لزيادة المساحة السطحية للمفصل لتوزيع الوزن على نحو افضل وخاصة في الركبة والورك التي تضررت من الالتهاب. فهي للاسف محاولة لعلاج مشكلة تنشئ نتوء عظمي اخر. تشخيص التهاب المفاصل الروماتيزميّ كانت معايير التشخيص الرسمية لالت…
42	Timing Matters Empty Stomach, Bad Choices The hungrier you are, the harder it is to resist unhealthy foods. When your stomach is empty, your blood sugar levels drop. This increases your desire for foods like burgers, pizza, brownies, and ice cream. When researchers used functional MRI brain scans to study why this happens, they discovered that the body focuses on feeding itself high-calorie foods…	التوقيت مهم المعدة الفارغة تسبب لك اختيارات سيئة كلما شعرت بالجوع كان من الصعب عليك مقاومة الأطعمة غير الصحية بسبب انخفاض مستويات السكر في الدم عندما تكون معدتك فارغة ولذلك تزيد رغبتك في تناول الأطعمة مثل الشطائر والبيتزا والكعك والمثلجات. عندما قام الباحثون بمسح الدماغ بالرنين المغناطيسي لدراسة هذا الامر و جدوا أن الجسم يركز على تناول الأطعمة ذات السعرات الحرارية العالية لإعادة مستويات السكر في …
43	Don’t Be Fooled by the Decoy Restaurants know how to lure us in. They have sophisticated research showing how placing salads and other healthy options on the menu — even if we don’t buy them — allows us to justify going there in the first place. We are more likely to visit a less healthy restaurant when a healthy option is available compared with when no healthy options are available. It is hard …	كن متقدمًا بخطوة لا تنخدع بالمظهر تلجأ المطاعم لطرق ذكية تجذب بها انتباه الناس حيث أنها تستخدم طرق نتاج بحث علمي متقن كإضافة السلطة والأطباق الصحية الأخرى في قائمة الطعام حتى وإن لم نخطط لطلبها لتكون مبررًا لاختيارنا هذا المطعم. إن توفر أطباق صحية في مطعم يقدم وجبات غير صحية يزيد من فرصة إقبالك عليه مقارنة بمطعم لا يقدم أطباق صحية وبالتالي تنطلي عليك الخدعة بسرعة. كنت ضحية لهذه الحيلة مؤخرًا عندم…
44	Reminders Grab a Handful Think about the last time you ate at your desk while working, had a meal while watching television, or dined while driving. I’m guessing you ate more than you planned and enjoyed your meal less. A Harvard study found that people consumed 167 additional calories per hour while watching television. I have a real weakness for dark chocolate almonds. In the past, I would grab…	تنبيهات تناول حفنة تذكر آخر مرة كنت فيها جالسا على مكتبك تأكل بينما تعمل أو عندما تناولت وجبة عند مشاهدة التلفاز أو عندما تناولت العشاء خلال قيادتك. أراهن أنك تناولت أكثر مما خطت و استمتعت أقل بوجبتك. حيث أثبتت الدراسات بجامعة هارفارد أن الناس استهلكت 167 سعره حرارية في الساعة الواحدة أثناء مشاهدة التلفاز. أنا لدي نقطة ضعف حقيقية لدى الشوكلاتة الداكنة المحشية باللوز. في السابق, كنت آخذ العلبة معي…
45	Preface Why you (and your baby) need this book Years ago, I asked my friend Robert Crayhon, M.S., the greatest nutrition educator and director of the Boulderfest nutritional medicine conference, the following question: If you could wave your hands and make one single dietary change that would benefit the world the most, what would it be? Here’s what he said:I’d put every pregnant woman on fish oi…	تمهيد لماذا تحتاجين أنتِ وطفلكِ هذا الكتاب قبل عدة سنوات سألت صديقي روبرت كرايهون معلم التغذية الكبير الحائز على شهادة الماجستير ومدير مؤتمر الطب الغذائي بولدرفيست قبل عدة سنوات الأسئلة التالية: لو حصلت على عصاً سحرية تمكنك من إحداث تغيير غذائي واحداً سينفع العالم فماذا سيكون؟ فأجاب قائلاً: سأعطي كل امرأة حامل مكمل زيت السمك. إن المثير للإنتباه حول رده ليس كونه أختار مكمل زيت السمك كأهم مكمل للمر…
46	Sweet Potatoes A BAKED SWEET POTATO (CALLED A YAM in some areas) is a tasty treat any time of year. And you can enjoy this delicious comfort food guilt-free. Just 1 cup of baked sweet potato contains an amazing 4 g of protein and 7 g of fiber, and it’s a good source of vitamin B6, potassium, vitamin A, vitamin C, and manganese. All that and fantastic flavor, too! SWEET POTATOES AT A GLANCE Servin…	البطاطا الحلوة البطاطا الحلوة المخبوزة بالفرن (ويُطلق عليها اليَام في بعض المناطق) هي أكلة لذيذة في أي وقت من السنة. وبإمكانك التمتع بهذه الوجبة المحببة ذات الطعم الرائع من غير الإحساس بالذنب حيث يحتوي كوب واحد من البطاطا الحلوة المخبوزة على ٤ جرامات من البروتين و ٧ جرامات من الألياف، وهي مصدر من مصادر فيتامين B6 والبوتاسيوم وفيتامين A وفيتامين C والمنجنيز. نبذة عن البطاطا الحلوة: حجم الحصة: كوب …
47	LEEKS ARE THE VEGETABLE Equivalent OF A super multivitamin-mineral tablet. Leeks are a great source of vitamin A, vitamin C, and iron. Plus, leeks contain fiber, B vitamins, iron, and other minerals. Leeks AT A GLANCE: Serving Size: 1 cup (89 g) Calories: 54 Saturated Fat: 0 g Protein: 1 g Fiber: 2 g Calcium: 5% Vitamin A: 28% Vitamin C: 15% Iron: 8% Not Your Ordinary Onion Leeks look like huge o…	الكراث يعتبر الكراث مصدر طبيعي ممتاز لفيتامين A و فيتامين C و الحديد بالإضافة لاحتوائه على الألياف و فيتامين B و الحديد العديد من المعادن الأخرى, يعتبر نبات الكراث بديل طبيعي ممتاز لأقراص الفيتامينات و المعادن. نبذة بسيطة عن الكراث حجم الحصة: كوب واحد ( ٨٩ جرام) السعرات الحرارية: ٥٤ الدهون المشبعة: ٠ جرام البروتين: ١ جرام ألياف: ٢ جرام كالسيوم: ٥٪ فيتامين A: ٢٨٪ فيتامين C: ١٥٪ الحديد: ٨٪ الفرق بي…
48	CHAPTER 17 THE IMPORTANCE OF OTHER HEALTH CHECKS: THE EYES, FEET AND KIDNEYS THE EYES In chapter 3 we discussed the different types of complications that can occur if type 2 diabetes is not well controlled, and in the last chapter we talked about the importance of controlling cholesterol and blood pressure levels to minimise the risk of complications. And, in between, we have learned that making …	الفصل 17 أهميه الفحوصات الطبية الاخرى: العيون والقدمين والكلى العيون في الفصل الثالث ناقشنا الأنواع المختلفة من المضاعفات التي يمكن أن تحدث لمرضى السكر من النوع الثاني إذا لم يتم السيطرة عليه بشكل جيد. وفي الفصل السابق تحدثنا عن أهمية السيطرة على مستويات الكوليسترول وضغط الدم للحد من خطر حدوث مضاعفات. وفيما بين الفصلين الثالث والسابق تعلمنا بأن إحداث تغييرات بنمط الحياة وفقدان الوزن قد يكونان ذات…
49	ITS TIME TO GET MORE ACTIVE In chapter 4 we discussed how type 2 diabetes is initially managed by diet and exercise. So far we have concentrated on the diet part of this duo: in this chapter we will look at the exercise part. Exercise is recommended for people with diabetes because it has been shown that it helps reduce blood glucose levels. Regular aerobic exercise, such as running or cardiovasc…	حان وقت النشاط لقد سبق وتناقشنا في الفصل الرابع عن النوع الثاني من داء السكري الذي نستطيع أن نسيطر عليه من خلال الرياضة والنظام الغذائي, كما أننا ركزنا على النظام الغذائي في الفصل السابق و في هذا الفصل سوف نركز على ممارسة الرياضة. ينصح مرضى داء السكري بممارسة الرياضة ت تساعد على تقليل مستوى الجلوكوز بالدم. تعد رياضة الركض من التمارين التي تقلل الهيموغلوبين في الجسم حوالي 7 لتر أي 7,0 بالمئة , بين…
50	Chapter 6 Can Diabetes Be Reversed? In the previous chapter we learned how the rapid increase in diabetes is due to the increase in obesity in different populations around the world. The raises an intriguing question: if a person develops diabetes after they become Overweight, will they still have diabetes if they lose weight? In chapter 2 i descripted how diabetes is diagnosed on the basis of bl…	الفصل السادس هل يمكن تراجع مرض السكري؟ تعلمنا في الفصل السابق كيف أن داء السكري يزداد ازدياداً سريعاً بسبب السمنة المفرطة في مختلف أنحاء العالم, وهذا يثير سؤالاً محيراً: اذا أصيب شخص بداء السكري بسبب السمنة المفرطة لماذا يستمر لديه المرض حتى اذا فقد وزنه؟. تناولنا في الفصل الثاني وصف كيف يتم تشخيص داء السكري على أساس فحص الدم التي قد يشير إلى وجود حالة ما قبل السكري وتسمى بضعف تحمل الجلوكوز أو خل…
51	CHAPTER 10 OTHER FOOD TYPES AND DRINK FAT Fat has a bad name — literally. As a noun it describes a type of food, but the same word, as an adjective, describes someone who is overweight. And so it is easy to link the two and think that fat in food causes fat people. The body uses fat for energy stores and to protect most of our internal organs; it is also used to store vitamins such as vitamin D. …	الفصل العاشر أنواع أخرى من المشروبات والأطعمة: الدهون: يحمل مصطلح الدهون معنى سيء. فهي كمسمى تصنف كنوع من أنواع الطعام.ولكن في الوقت ذاته عندما تكون تستخدم كصفة لشخص بدين،من السهل الاعتقاد بوجود علاقة وثيقة وهي سبب البدانة. يستخدم الجسم الدهون لتخزين الطاقة وحماية معظم الأعضاء الداخلية: وأيضا يستخدم لتخزين الفيتامينات مثل فيتامين د.لهذا من الضروري أن يحتوي نظامنا الغذائي على نسبة من الدهون.والحقي…
52	The scientific physician welcomes the establishment of a standard loaf of bread made according to the best scientific evidence.... Such a product can be included in diets both for the sick and for the well with a clear understanding of the effect that it may have on digestion and growth. Morris Fishbein, MD, editor, Journal of the American Medical Association, 1932 IN CENTURIES PAST, a prominent …	يرحب الفيزيائي بعمل رغيف خبز قياسي المصنوع وفقاً لأفضل الادلة العلمية .... حيث يمكن اضافة هذا المنتج الى حمية الشخص المريض او الصحي مع فهم واضح لاحتمالية تأثيره على الهضم والنمو. الطبيب والمحرر موريس فيشبين، من مجلة الجمعية الطبية الامريكية , عام 1932 في القرون الماضية, كانت الكرش البارزة صفة ذوي الامتيازات .. علامة للثراء والنجاح .. رمزا بأنه لا يلزم عليك تنظيف اسطبلاتك وحرث حقلك بنفسك. في هذا ا…
53	As already mentioned a major cause of obesity is a lack of underlying nutrition We must remember that the body considers malnutrition as much a threat as starvation To put it crudely: famine makes you fat Over-eating does not make you fat if you stick to nutritious food But if you eat junk food this deprives your body of good nutrition, and this is perceived by the body as famine so leptin goes d…	ان السبب الرئيسي للسمنة كما ذكر سابقا هو نقص التغذية الأساسية. علينا أن نتذكر أن الجسم يعتبر سوء التغذية بقدر التهديد الذي يسببه الجوع. وببساطة الجوع يجعلك بدينا. فالإفراط في الاكل لا يجعلك بدينا إذا اتبعت نظام غذائي مفيد للجسم. ولكن إذا اكلت الوجبات السريعة قد يفقد جسمك التغذية الجيدة وبالتالي ينخفض بروتين اللبتين ليزيد من الشعور بالجوع فيستشعر الجسم بالجوع. والشعور بالجوع هو السبب الذي جعل البد…
54	The Big Questions NOT long ago I traveled to the emirate of Dubai to present a workshop on autism. Parents and professionals had flown in from all over the Middle East and as far away as Nigeria. In appearance the audience hardly resembled the kinds of groups I’m accustomed to addressing in the United States, Europe, or Australia. Many of the women were dressed in burkas, and some wore the tradit…	الأسئلة الهامة منذ وقت ليس ببعيد سافرت الى إمارة دبي لتقديم ورشة عمل بشأن مرض التوحد وقد حضر العديد من الآباء وبعض المتخصصون القادمون من جميع أنحاء الشرق الأوسط ومناطق بعيدة مثل نيجيريا ويشبه منظر الحضور بالكاد نوع من المجموعات قد اعتدت على مناقشتهم في الولايات المتحدة أو أوربا أو استراليا ، كان الكثير من النساء يرتدين البرقع كما ارتدى البعض لباس تقليدي يغطي الرأس يُعرف بالنقاب ولكن كانت غالبية ا…
55	REVOLUTIONARY RESEARCH New neuroscience studies are continuously demonstrating the inner workings of our brains. Let’s spend a little bit of time looking at some of the revolutionary research that is helping experts better understand how you can train your brain to get thin. The Impact of Valuation and Imagination on Decision Making You can’t make decisions without using the vital process of eval…	البحث الثوري: تُظهر دراسات علم الأعصاب الجديدة باستمرار طرق عمل أدمغتنا لذلك دعونا نقضي القليل من الوقت في النظر لبعض البحوث الثورية التي تساعد الخبراء على فهم أفضل لكيفية تدريب دماغك لتكون أنحل. أثر التقييم والخيال في صنع القرار لا يمكنك اتخاذ قرارات بدون استخدام عملية حيوية من التقييم بغض النظر عن القرار الذي تحتاج إلى اتخاذه فسواء كنت تفكر فيما ستتناول على العشاء أو تقوم بتحديد أهداف حياتك فإن…
56	Marissa’s comments: The side effects from chemo and hormonal therapy were really getting to me. My most miserable problem was night sweats that prevented me from sleeping well. I found that installing a ceiling fan above my bed and keeping it on low all night really helped. Wearing cotton short sleeve and sleeveless nightgowns instead of pajamas that were long sleeved with long pants has been a g…	تعليق ماريسا: كانت الأعراض المصاحبة للعلاج الكيميائي والهرموني قد بدأت تؤثر بي, وكان التعرق الليلي أكثر المشاكل بؤساً و هو ما كان يمنعني من النوم جيداً , وقد وجدت أن تركيب مروحة للسقف فوق سريري وتشغيلها على سرعةُ خفيفة طوال الليل يساعدني على النوم. وكان ارتداء قمصان النوم القطنية قصيرة الأكمام أو بلا أكمام عوضاً عن لباس النوم ذو الأكمام الطويلة و البنطال الطويل عطية من عند الله, كما وجدت على الإن…
57	Likes and dislikes Every man carries within him a world, which is composed of all that he has seen and loved, and to which he constantly returns, even when he is travelling through, and seems to be living in, some different world. François-René de Chateaubriand, Travels in Italy, 1828 HE WON’T EAT ANYTHING BUT CORNFLAKES COMPLAINED THE mother of a boy I used to know. Breakfast, lunch, or dinner—a…	ماتحبه وتكرهه كل إنسان يحمل في داخله عالما يتكون مما رآه في حياته وأحبه ويعود إليه باستمرار حتى وإن بدأ يسافر ويعيش عالمًا آخرًا. فرانسوا رينيه دي شاتوبريان، يسافر في إيطاليا، 1828 اشتكت أما كنت أعرفها من ابنها بقولها: لا يأكل أي شيء ،لا يأكل سوى الكورن فليكس(رقائق الذرة) فهو دائما يتناول وعاء من رقائق الذرة والحليب في كل الوجبات حتى عند زيارة الأخرين في منازلهم فإنه لا يتنازل عن هذا الطبق أبدا. …
58	Humans have already traveled to the moon and back. At some point, the conversation moves to other lifestyle topics and what it’s like to really live in the twenty-first century. You dive into describing modern medicine with its stupendous array of drugs to treat problems and combat diseases and germs. Serious threats to survival are few and far between. Not many people need to worry about crouchi…	ستخبرهم بأن البشرية قد سافرت للقمر وعادت، ثم سينتقل الحوار لمواضيع أخرى تتعلق بنمط الحياة وكيف تبدو الحياة فعلاً في قرن الواحد والعشرين، فقد تغوص في وصف الطب الحديث ومجموعته الواسعة من الأدوية لمعالجة المشاكل ومحاربة الأمراض والجراثيم، وكيف أن التهديدات الخطيرة للبقاء على قيد الحياة قليلة وبعيدة عنا، فالقليل الآن يقلق بشأن النمور المفترسة والمجاعات والآفات، كما تشرح لهم تجربة الشراء من محلات الدك…
59	All this nursery mush kept children in a state of constant babyhood. The endless sieved vegetables and slippery milk puddings were not dissimilar from the panadas and paps that formed a baby’s first solid food. At the same time, there was a view that children must be given plenty of very hard food—crisp stale toast and the like—in order that they might learn to exercise their jaws and teeth. Grea…	يجب أن تضمن هذه الحضانة للأطفال طفولة مستقرة، ولا تختلف الخضروات المنخولة وحلويات الحليب عن الثريد و ( حلمة الثدي ) اللذان يعتبران أول طعامٍ مُتماسك للطفل، وفي الوقت ذاته هُناك نظرية بأنه يجب إعطاء الأطفال الكثير من الأطعمة الصلبة مثل : الخبز المُحمص ، وما شابه ذلك – حتى يتعلم الأطفال كيفية تحريك فكيهم وأسنانهم لما فيه من التركيز الشديد على عملية المضغ، فأن الطعام الذي لا يحتاج الى مضغ يجعل الطفل…
60	This chapter should make you rejoice. I’m going to rescue you from a lifetime of trying to avoid eating fat and cholesterol and prove how these delicious ingredients preserve the highest functioning of your brain. We’ve developed a taste for fat for good reason: It’s our brain’s secret love. But in the last several decades it’s been demonized as an unhealthy nutritional source, and we’ve regretta…	يجب أن يجعلك هذا الفصل مبتهجًا . سأنقذك بطريقةٍ ما من تجنب الدهون والكوليسترول بدلًا من محاولة ذلك مدى الحياة وأثبت لك محافظة تلك المواد اللذيذة على أداء الدماغ العالي . لقد وضعنا للدهون طعمًا لسببٍ وجيه : إنها الحب السري لدماغنا، ولكنها وصفت بأنها مصدر غذائي غير صحي في العقود القليلة الماضية، وللأسف نتج لدينا رهاب من الدهون ومجتمع مدمن للكربوهيدرات ( أكل الكثير من الكربوهيدرات لا يساعدنا في خفض …
61	Given the influx of these strange new items, it would be easy to blame China’s new weight problem on a move away from a traditional diet. Don’t eat anything your greatgrandmother wouldn’t recognize as food, is one of Michael Pollan’s rules for healthy eating. A Chinese child eating blueberry muffins and drinking a milkshake has definitely broken this rule. But we shouldn’t be too quick to attribu…	سيكون من السهل إلقاء اللوم في مشكلة زيادة الوزن الجديدة على إتباع النظام الغذائي التقليدي وذلك نظراً لدخول أغذية متنوعة وجديدة في الصين. تقول قاعدة من قواعد مايكل بولن للطعام الصحي لا تأكل أي شيء لا تعرفه أم جدتك. فإن تناول الطفل الصيني لكعكة التوت البري وشربه لمخفوق الحليب كسر هذه القاعدة بكل تأكيد. ولكن يجب علينا ألّأ نتعجّل في نسب مشكلة زيادة الوزن في الصين للحداثة. لا تزال طريقة التعامل مع ال…
62	The style of feeding that has been shown to offer the best outcomes for children’s health in numerous studies is called authoritative. Such parents are highly demanding that a child should eat well. Yet they are also highly responsive to cues from the child (so no force-feeding or coercion). Another way of putting it is high warmth, high control. The ideal scenario for a child is to grow up in a …	نمط التغذية الذي عرض ليعطي أفضل النتائج لصحة الأطفال في العديد من الدراسات الذي يسمى الديموقراطية يحرص الوالدان فيه بشدة بأنه يجب على الطفل أن يأكل جيدا، مع ذلك أيضا هم متجاوبون جدا لنماذج من الطفل (لذلك لا للإطعام القسري أو الإرغام). وطريقة إثبات أخرى وهي سياسة حزم ولين فالسيناريو المثالي للطفل هو نموه في منزل حيث لا يحتوي على كميه كبيرة من الطعام غير الصحي، لكن أيضا تجنب القلق المبالغ فيما يتعل…
63	Some learn to love bitterness; some tolerate it because they enjoy the buzz they get from a bottle of IPA or a cup of strong French press coffee; and some hardly taste it at all. Psychologist Linda Bartoshuk of Yale University was the first to use the term supertaster in the mid-1990s to refer to individuals with a heightened response to certain tastes, predominantly bitter ones (the phenomenon w…	يتعلم البعض حب المرارة بينما يتحمله البعض من أجل الإستمتاع بشرب زجاجة من الIPA (نوع من المشروبات الكحولية) حتى الثمالة أو احتساء فنجان من القهوة الفرنسية المركزة أما البعض الآخر فهم بالكاد يتذوقون المرارة.إن أول من استخدم مصطلح المتذوق الجيدهي الأخصائية النفسية ليندا بارتوشوك من جامعة ييل في منتصف التسعينات الميلادية إشارة إلى الأفراد الذين يتمتعون بإستجابة مضاعفة لنكهات معينة وغالبا ماتكون المرة…
64	In the seventeenth century, the term sprue was introduced into the English language from the Dutch word sprouw, which means chronic diarrhea—one of the classic symptoms of celiac disease. The English pediatrician Dr. Samuel J. Gee was among the first to recognize the importance of diet in managing patients with celiac; he gave the first modern-day description of the condition in children in a lec…	أُدخل مصطلح ذَرَب في القرن السابع عشر إلى اللغة الإنجليزية وهو مقتبساً من الكلمة الهولندية سباو والتي تعني الإسهال المزمن، أحد الأعراض التقليدية للداء البطني أو الاضطرابات الهضمية. كان طبيب الأطفال الدكتور صامويل ج. جي من بين أول من أدرك أهمية النظام الغذائي -الحمية- للتعامل مع المرضى الذين يعانون من الاضطرابات الهضمية. وأعطى الدكتور الوصف المستعمل في عصرنا هذا للحالة التي يصاب فيها الأطفال في مح…
65	One of the reasons that we do not usually think of our tastes as learned is that most of the learning tends to happen in the very early years of life—and then it stops. For those of us who believe in personal development, it is depressing to learn that a person’s food likes at age two generally predict their tastes at twenty. In 2005, researchers in Turkey interviewed nearly seven hundred undergr…	من أحد الأسباب التي لا تجعلنا عادة نظن بأن الأذواق مكتسبة هي أن أغلب العادات نتعلمها في المراحل المبكرة من حياتنا ومن ثم تتوقف. ومن الأمور المحبطة بالنسبة للذين يؤمنون بالتطور الشخصي، هو معرفة أن نمط الأكل لدى المرء الأكل الذي يحب في عمر الثانية غالبا ما يحدد ذوقهم في الطعام في العشرينات من العمر. أجرى باحثون عام 2005 مقابلات في تركيا مع ما يقارب سبع مائة طالب في المرحلة الجامعية بالإضافة إلى أمه…
66	Preventive Measures: 1-Health awareness of how the virus developing and transmitting. 2-To hold on the values and the high moral standards, and to be aware of the infectious resources. 3-Prevent infected women from pregnancy. 4-Prohibit the use of blood, its transfusion to patients and its purchase, until after examining it and ensuring it is free of the AIDS virus. 5- Use disposable needles of t…	الإجراءات الوقائية: التوعية الصحية السليمة عن كيفية الإصابة وانتقال الفايروس. التمسك بالقيم والأخلاق الحميدة والابتعاد عن مصادر العدوى. منع المراة المصابة من الحمل. عدم استعمال الدم ونقله للمرضى او شرائه الا بعد فحصه والتاكد من سلامته وخلوه من فيروس الايدز. استعمال الابر التي تستعمل لمرة واحدة فقط. الامراض المنتقلة عن طريق التلامس الجلدي: 1- الجرب (scabies) : هو مرض جلدي معد، يتميز بحكة شديدة تزد…
67	When I talked to other women, it seemed like this was part of a more general theme – it’s a good idea to try to be in good physical shape before getting pregnant. Independent of any medical advice, I had long harboured the fantasy of getting to my goal weight prior to figured if I got to this weight again before we got pregnant, I’d be one of those Heidi Klum-type women who look great throughout …	عندما تحدثت مع نساء أخريات بدا لي وكأن هذا الأمر مجرد جزء من أمر أكبر فمن الجيد أن تحاول المرأة أن تصبح ذات جسد رائع قبل الحمل. وبعيداً عن المشورات الطبية تمنيت الحصول على الوزن الذي لطالما حلمت به قبل الحمل. لم أتوصل إلى هذا الوزن بالضبط إلا مرة واحدة في حياتي وكانت هذه المرة قبل يوم زفافي حيث أنني كنت أمارس تمارين التحمل لتسعين دقيقة في الساعة الخامسة فجرآ أربعة أيام في الأسبوع. توقعت أنه لو اس…
68	Based on this picture and the more complex statistical analysis in the paper, there is no evidence that more drinking leads to higher levels of behavior problems. In fact, the statistics in the paper show that light drinkers (that’s two to six drinks per week) are actually significantly less likely to have children with behavior problems than women who do not drink at all. The other big concern w…	بناء على هذه المعطيات والتحليل الإحصائي الأكثر تعقيدا في هذه الدراسة , لا يوجد هنالك أي دليل على أن الشرب الكثير للكحول يقود للمشكلات السلوكية . تشير الاحصائيات في هذه الدراسة إلى أن النساء اللاتي لا يكثرن من شرب الكحول ( من مشروبان إلى ست مشروبات للأسبوع الواحد ) أقل عرضة لإنجاب أطفال لديهم مشكلات سلوكية من النساء اللاتي لا يشربن على الاطلاق . والمسبب الآخر للقلق هو علاقة الكحول بانخفاض معدل الذ…
69	Introduction Finding out you are pregnant may very well be the single most exciting moment in your life. Having a baby is amazing, thrilling and somewhat overwhelming, all at once. If you became pregnant soon after making the decision to go for it, you are probably thrilled that it worked out so quickly and easily. On the other hand, if you have been trying for some time to conceive, the positive…	المقدمة قد تكون معرفتك بأنكِ حامل واحدة من أكثر اللحظات إثارة في حياتك , حيث أن إنجاب طفل يعتبر أمرًا رائعًا ومٌشوقًا ، ولكنه متعب بعض الشيء. فإن أصبحتِ حاملًا بعد وقت قصير من اتخاذك هذا القرار فمن الأحرى أنكِ ستكونين سعيدة بأن الأمر تكلل بالنجاح بسرعة وبسهولة ، أما إذا كنتِ تسعين إلى الحمل منذ مدة فإن النتيجة الإيجابية في شريط اختبار الحمل ستكون لحظة الفرح والراحة الرائعة التي طالما انتظرتيها ، …
70	BABY - What’s Happening: Your embryo is still tiny—at 2 weeks and 1 day old, he is just 1/15 inches long. Still, the embryo is hard at work organizing its layered cells for development. The outer layer, or ectoderm, will produce your baby’s neural tube from which his spine and brain will form. The middle layer, or mesoderm, is the setting for the growth of your baby’s heart and circulatory system…	ماذا يحدث للطفل؟ عندما يبلغ عمر الجنين أسبوعين ويوم فإنه لايزال صغيراحيث يبلغ طوله1/15 بوصة فقط، ومع ذلك فالجنين يعمل بجهد على تنظيم طبقات خلاياه من أجل النمو، فتنتج الطبقة الخارجية أو الأديم الظاهر الأنبوب العصبي لطفلك والذي يتشكل منه العمود الفقري والدماغ. أما الطبقة الوسطى أو الأديم المتوسط فهي المكان الذي ينمو فيه قلب طفلك والجهاز الدوري الدموي له وكذلك الأعضاء التناسلية والعظام. ، وأخيرا تنت…
71	\\Introduction You’ve tried diet after diet. You eat well. You exercise. Yet you’re still gaining weight. Maybe a little, maybe a lot. Or maybe you’re not gaining, but you just can’t seem to drop those unwanted pounds the way you used to. At the same time, you might suffer from hormonal disorders, migraines, depression, skin conditions, joint pain, IBS, Crohn’s, or other ailments. One day you ste…	المقدمة هل لاحظت انه بالرغم من إتباعك لأكثر من حمية غذائية و تناولك الأطعمة الصحية وممارستك للرياضة فان وزنك يزداد ربما قليلا وكثيرا أوقد لا يزداد إطلاقا، لكنك لا تستطيع خسارة تلك الكيلوجرامات غير المرغوب فيها بالطريقة التي اعتدت عليها . وقد تعاني في الوقت نفسه من الاضطرابات الهرمونية والصداع النصفي والاكتئاب والأمراض الجلدية وآلام المفاصل والقولون العصبي و داء كرون الذي يصيب الأمعاء أو أمراض أخر…
72	Know Your Cycle Monitor your blood sugars carefully before, during, and directly after your period, as hormonal changes during your cycle influence your diabetes control. Tracking any changes in your blood sugar levels will help you recognize trends for next month and plan for your needed adjustments to food or medications. Regular exercise can be very effective in mans blood sugar levels in wome…	تعرفي على دورتك الشهرية عليك مراقبة السكر في الدم بعناية قبل وأثناء و بعد الدورة الشهرية مباشرة لأن التغيرات الهرمونية أثناء دورتك تؤثر على تحكمك بمرض السكري. كما أن تتبع أي تغيرات في مستوى السكري في الدم لديك سوف يساعدك للتعرف على توجُهاتك للشهر المقبل والتخطيط على التعديلات المطلوبة للغذاء أو الأدوية. ومن الممكن أن تكون ممارسة التمارين الرياضية بانتظام فعالة جدا في إدارة مستويات السكر في الدم ل…
73	8- Know Your Blood Pressure Controlling your blood pressure is also a critical part of keeping your kidneys healthy (as well as your cardiovascular system, eyes, and feet). Most adults with diabetes should have a blood pressure goal of less than 140/90 mmHg (your goal may vary depending on your individual health history). 9- DASH for Better Blood Pressure The Dietary Approaches to Stop Hypertensi…	8- معرفة ضغط الدم يعتبر تحكمك في ضغط الدم جزء حساس للمحافظة على صحة الكليتين لديك ( بالإضافة إلى الجهاز القلبي الوعائي والعينين والأقدام ). أغلب البالغين المصابين بالسكري يجب أن يكون أمد ضغط الدم لديهم أقل من90\\140 مليمتر من الزئبق ( من الممكن أن يكون أمدك يعتمد على التاريخ الصحي الفردي) لضغط دم أفضل (DASH) 9- (DASH) برنامج النهج الغذائي لإيقاف ضغط الدم هو مخطط غذائي غني بالفواكه والخضار والبروت…
74	Weight Loss Tips 21 Proven Techniques to Lose Weight Roberta Temes Copyright 2012 by Roberta Temes Smashwords Edition Roberta Temes, Ph.D. Hello, Have you ever been told that if you raised your self-esteem, you would lose weight? My name is Dr. Roberta Temes. I am a psychotherapist, and I am here to tell you that the idea of an overweight person having low self-esteem is a myth. Every psychologic…	نصائح لنزول الوزن ٢١ طريقة مثبتة لإنزال الوزن الحقوق محفوظة لعام ٢٠١٢ للمؤلفة الدكتورة روبرتا تيّمز مرحبا هل اخبرك احدهم من قبل أنك اذا قمت بتنمية ثقتك بنفسك سوف تخسر بعض الوزن؟ اسمي الدكتورة روبرتا تيّمز وانا طبيبة في علم النفس و اريد ان اثبت لك بأنة لا يوجد شخص بدين ليس لدية ثقة بنفسه. أثبتت جميع الاختبارات النفسية التي اختبرها الأشخاص البدناء بأن صحتهم قد تكون جيدة او غير جيدة مثل اي شخص في ال…
75	It is essential that you understand how your oncologist will determine if the chemotherapy is working. You should know when the doctor will make this assessment, and how. It may not always be necessary to do a scan. If, for example, your doctor can feel an enlarged lymph node in your neck, she will measure this with a ruler each time you come for a visit. If you have cancer in your liver, your li…	من الضروري ان تفهم كيف سيقوم اخصائي الاورام بتحديد ما اذا كان العلاج الكيميائي يعمل بشكل جيد,كما يجب عليك انا تعرف متى سيقوم الطبيب بالتقييم وكيف. فقد لايكون من الضروري دائماالقيام المسح ,فعلى سبيل المثال يمكن لطبيبك ان يشعر بتضخم العقدة اللمفاوية في عنقك وعلى ذلك سوف تقوم بالقياس في كل مره تأتي فيها للزيارة بأداة التسطير. فاذا كان لديك سرطان في الكبد فأن اختبار الدم للكبد قد تكون مرتفعة ويمكن لط…
76	ITS OUT Of MY CONTROL `Because of my genes, I cant fit into my skinny jeans!` If you can rattle off handful of excuses for why youre overweight__ `Im fifty years old`; `I inherited this body type` “I come from a family of nonathletes` __ faster than you can recite your Social Security number, then you could very well be standing in the way of your own success. We know that there are many valid re…	فقدت السيطرة على جسمي! `لا تلائمني البناطيل الضيقة والسبب جيناتي` إذا كنت تستطيع سرد الأعذار المرتبطة بوزنك الزائد بشكل أسرع من سرد رقم هويتك الإجتماعي مثل `أنا في عمر الخمسين` أو `ورثت السمنة من عائلتي` أو `أنحدر من عائلة غير رياضية` فأنت بهذا تقف عائقاً أمام نجاحك. نعلم أن هناك العديد من الأسباب خلف سمنتك لكن هذه الأسباب ليست من يحدد سواءً كنت ستنجح في خسارة هذا الوزن أم لا، فمن السهل أن نلوم ا…
77	CHAPTER ONE: The First Step—Understanding Diabetes Jane Gillian was an obese fifty-six-year old when she became seriously ill and was hospitalized. She experienced an embolic stroke, paralyzing her left side, and, while at the hospital, they also found that she had severe diabetes. Jane had a family history of diabetes; both parents were overweight and diabetic. Her medical history included high …	الفصل الاول الخطوة الأولى – فهم مرض السكري كانت جين جيليان تعاني من السمنة المفرطة في عمر السادسة والخمسون، وأصبحت مريضة جدا وأُدخلت المستشفى وتم تشخيص حالتها بأنها مصابة بالسكتة الدماغية و شلل في الجزء الأيسر من جسمها، وخلال فترة تواجدها في المستشفى وجدوا أنها تعاني من مرض السكري الحاد. كان لدى جين تاريخ عائلي مع مرض السكري، حيث أن كلا والديها عانا من الوزن الزائد ومرض السكري، كما تضمن تاريخها ا…
78	30 Pursue Your Passions In college, I was a rower. More recently (several years beyond twenty-something), I‘ve picked up tennis, horseback riding, and yoga. I love switching my hobbies around as I age so that I keep myself enthusiastically in the game while I also honor my body‘s changes through the decades. A lot of my hobbies today revolve around my kids, and my pursuits will continue to evolve…	30. مارس شغفك أثناء مرحلة الجامعة كنت سباحا, أما مؤخرا (بعد عدة سنوات من بلوغ العشرينات) فقد مارست رياضة التنس وركوب الخيل واليوغا. أحب التنويع في هواياتي مع التقدم في العمر وذلك للحفاظ على حماسي، وكذلك مراعاة للتغييرات التي حصلت لجسمي خلال العقود الماضية. واليوم كثير من هواياتي تتمحور حول أطفالي وستتطور هواياتي معهم مع تقدمنا في العمر, وأنا بالطبع أجرب أمورا مختلفة مع مرور الوقت. من المهم أن نخت…
79	IN RECENT YEARS, something called birthday cake ice cream has started popping up. It is a lurid multicolored confection with sprinkles, clots of frosting, and chunks of cake running through it. The idea is that it tastes like the lovingly iced cake your mother made for you when you were six and it was your birthday and you gave your friends slices of cake to take home, damply wrapped in party nap…	ظهر في الأعوام الأخيرة طبق يسمى بمثلجات كعكة يوم الميلاد و هي حلوى متوهجة بعدة ألوان مع رشات سكر مغطاة بكمية من كريمة التزيين و قطع من الكعك موجودة بين أجزاء المثلجات . و المغزى من هذه الحلوى هو تذوق الكعكة المثلجة التي صنعتها لك أمك بكل مودة عندما كنت بعمر السادسة في يوم ميلادك و أعطيت لأصدقائك قطعا منها ليأخذوها إلى منزلهم مغلفة بمناديل مائدة الحفلة بشكل رطب و لكن الفرق هو أنك لم تعد بعمر الساد…
80	The Two-Week Wait Here’s the thing about trying to get pregnant. The first half of the month you spend carefully timing ovulation, taking your temperature, maybe weeing on a stick every morning. Then the second half of the month you . . . wait. You can’t do anything to get pregnant once ovulation has come and gone. You can’t yet figure out if you are pregnant. You’re just in limbo. And yet. You m…	إسبوعي الإنتظار تقضين النصف الأول من الشهر بتحديد وقت التبويض بدقة, وقياس درجة حرارتك, وقد تقومين بإجراء إختبار الحمل المنزلي كل صباح.* أما في النصف الثاني من الشهر فتقومين بـ... انتظري. لا تستطيعين القيام بأي شي في حال انقضى وقت التبويض. كما أنه لن يكون بوسعك إكتشاف ما إذا كنتي حاملاَ أم لا, وستكونين عندها في حالة إنتظار. وهذه هي الأمور المتعذر اجتنابها أثناء محاولة الحمل. ولكن على الرغم من ذلك …
81	CHAPTER 8 Wisdom from the Circle ONE weekend each year I sit in a circle of friends and acquaintances, old and new, and take in wisdom. The ritual began more than two decades ago. My wife, Elaine, and I were on vacation, hiking in Olympic National Park, when we began discussing the value of what we were doing: getting away to enjoy nature and escape the stress of everyday life. We reflected on ho…	الفصل الثامن حكم من المحيطين بنا عادة مااجلس في حلقة من الاصدقاء والمعارف القديمة والجديدة في عطلة نهاية اسبوع واحدة من كل سنة ونتبادل احاديث من الحكمة. بدأت الطقوس منذ اكثر من عقدين من الزمن. كنا انا وزوجتي الين في اجازة في الحديقة الوطنية الاولمبية عندما بدأنا مناقشة ماقمنا به والاستمتاع بالطبيعة بعيدا والهروب من ضغوط الحياة اليومية. وعكسنا ذلك على الاباء والامهات الذين لديهم طفل مصاب بالتوحد ب…
82	The Synapse Every neuron has a soma, or a central body, that contains the nucleus, or control center. Connected to the top of the soma, each neuron has a network of branches called dendrites that form a complex dendritic tree. On the bottom of the soma, each neuron has a single, long projection called an axon that signals to other neurons. An electrical impulse, called an action potential, is pro…	التشابك العصبي: تحتوي كل الخلايا العصبية على جسم الخلية أو جسم مركزي والذي يحتوي على النواة أو مركز التحكم. وتحتوي كل خلية عصبية على شبكة من التفرعات والتي تدعى بالزوائد الشجرية متصلة بأعلى جسم الخلية والتي بدورها تشكل شجرة من الزوائد الشجرية المعقدة. وتحتوي في نهاية جسمها على زائدة طويلة تدعى بالمحور العصبي والذي بدورة يرسل الإشارات العصبية لخلايا عصبية أخرى. وينتقل السيال العصبي من الزوائد الشج…
83	Step 3: Eat Bananas Eat 4,700 mg of Potassium Every Day 0K, weve talked about what you need to cut out of your life—extra pounds from around your waistline, and excess salt from your diet. Now comes the fun part! The Blood Pressure Down plan is not only about what you should limit in your diet (salt and calories) but also about what you should add in. Why is it that in populations that consume a …	الخطوة الثالثة : تناول الموز تناول البوتاسيوم بما يعادل 4,700 مليجرام كل يوم لقد تطرقنا في الخطوتين السابقتين عن خسارة الوزن و التوقف عن الإستخدام المفرط للملح في طعامك. وسنتحدث الآن عن الجزء الممتع! ألا وهو أن خطة خفض ضغط الدم لا تقتصر فقط على ( الملح والسعرات الحرارية ) بل أيضاً إلى إضافة بعض الأطعمة إلى نظامك الغذائي. لماذا بعض الشعوب التي تستهلك نظاماً غذائيا مبني على تناول الفاكهة والخضراوات…
84	Introduction In the autumn of 2009 my husband, Jesse, and I decided to have a baby. We were both economics professors at the University of Chicago. We’d been together since my third year of university, and married almost five years. Jesse was close to getting tenure, and my work was going pretty well. My 30th birthday was around the corner. We’d always talked about having a family, and the discus…	المقدمة قررتُ أنا وزوجي جيسي في خريف عام 2009 أن ننجب طفلًا. وكنا نعمل أساتذة في قسم علم الاقتصاد في جامعة شيكاغو ، حيث تعرفت عليه في السنة الثالثة من المرحلة الجامعية ، وتزوجنا بعد ذلك بخمس سنوات تقريبا. وكان جيسي على وشك أن يُثبت في عمله ، وكان عملي يسير بشكل جيد . ولم يتبقى على يوم ميلادي الثلاثين إلا قليلًا. كنا نتحدث دائمًا عن تكوين عائلة ، وَأصبح النقاش حول ذلك الموضوع جديًّا أكثر . ففي إحد…
